# Supplementary material for: Characterization and bioactivity of extracellular vesicles isolated from pomegranate
Source: Royal Society of Chemistry journal article supplement (doi:10.1039/d2fo01806c), 2022-01-01
Supplement: d2fo01806c1.pdf [file d2fo01806c1.pdf]

**Table S1. Proteins identified from PgEVs by LC-MS/MS**

| Accession_PUNGR | Peptides (95%) | Uniprot description                      | NCBI blast description                         |
|-----------------|----------------|------------------------------------------|------------------------------------------------|
| A0A2I0J3D2      | 36             | Plasma membrane ATPase                   |                                                |
| A0A2I0J5V6      | 15             | Uncharacterized protein                  | NAB domain-containing protein                  |
| A0A218WZE7      | 14             | Phospholipase D                          |                                                |
| A0A218XXE1      | 13             | Uncharacterized protein                  | Heat Shock cognate 70 kDa protein 2 (putative) |
| A0A218WC38      | 11             | Plasma membrane ATPase                   |                                                |
| A0A2I0KE01      |                | Plasma membrane ATPase                   |                                                |
| A0A2I0HJT1      |                | Uncharacterized protein                  | Monocopper oxidase-like protein SKU5           |
| A0A218X9C1      | 10             | 14-3-3 domain-containing protein         |                                                |
| A0A2I0L1X1      |                | Uncharacterized protein                  | Heat Shock protein 70 family (putative)        |
| A0A218XSW9      | 9              | Bet_v_1 domain-containing protein        |                                                |
| A0A2I0L8L2      |                | Glyceraldehyde-3-phosphate dehydrogenase |                                                |
| A0A2I0HLQ1      | 8              | Fructose-bisphosphate aldolase           |                                                |
| A0A218WS48      |                | NmrA domain-containing protein           |                                                |
| A0A218WTZ5      |                | PHB domain-containing protein            |                                                |
| A0A218WV62      |                | Uncharacterized protein                  | Actin 7 isoform 1                              |
| A0A2I0LBX0      |                | Uncharacterized protein                  | Late embryogenesis abundant protein LEA14-A    |
| A0A2I0JPV2      |                | Uncharacterized protein                  | Patellin-1                                     |
| A0A2I0JGV8      |                | Uncharacterized protein                  | Dehydrin COR47                                 |
| A0A2I0K2C8      | 7              | Annexin                                  |                                                |

**Table S1. Cont**

| <b>Accession_PUNGR</b> | <b>Peptides (95%)</b>               | <b>Uniprot description</b>                             | <b>NCBI blast description</b>                             |
|------------------------|-------------------------------------|--------------------------------------------------------|-----------------------------------------------------------|
| A0A2I0JQB8             | 7                                   | Enolase_C domain-containing protein                    |                                                           |
| A0A218XM98             |                                     | HATPase_c domain-containing protein                    |                                                           |
| A0A2I0I9F5             |                                     | TPR_REGION domain-containing protein                   |                                                           |
| A0A218VTX0             |                                     | Uncharacterized protein                                | Glutathione S-transferase                                 |
| A0A2I0H1D6             | 6                                   | Bet_v_1 domain-containing protein                      |                                                           |
| A0A2I0KBE7             |                                     | Malate dehydrogenase                                   |                                                           |
| A0A2I0L9U8             |                                     | t-SNARE coiled-coil homology domain-containing protein |                                                           |
| A0A218VXL1             |                                     | Uncharacterized protein                                | Fasciclin-like arabinogalactan protein 8                  |
| A0A2I0K2K1             |                                     | Uncharacterized protein                                | Nucleoredoxin 1 (probable)                                |
| A0A2I0JV44             |                                     | Uncharacterized protein                                | PKS_ER domain-containing protein                          |
| A0A2I0JJ12             |                                     | Uncharacterized protein                                | Sodium/calcium exchanger NCL                              |
| A0A2I0KLLK6            |                                     | 5                                                      | BRO1 domain-containing protein                            |
| A0A218WED1             | MFS domain-containing protein       |                                                        |                                                           |
| A0A2I0LER3             | Peptidyl-prolyl cis-trans isomerase |                                                        |                                                           |
| A0A2I0KK04             | PfkB domain-containing protein      |                                                        |                                                           |
| A0A2I0IHT0             | Tr-type G domain-containing protein |                                                        |                                                           |
| A0A218X1W8             | Uncharacterized protein             |                                                        | Methionine synthase II, Cobalamin-independent, (probable) |
| A0A2I0LBW5             | Uncharacterized protein             |                                                        | Phosphoglucomutase, cytoplasmic                           |

**Table S1. Cont.**

| <b>Accession_PUNGR</b> | <b>Peptides (95%)</b> | <b>Uniprot description</b>                                 | <b>NCBI blast description</b>              |
|------------------------|-----------------------|------------------------------------------------------------|--------------------------------------------|
| A0A2I0KRU1             | 5                     | Uncharacterized protein                                    | Ras-related protein Rab7                   |
| A0A2I0KH4              |                       | Uncharacterized protein                                    | CSC1-like protein ERD4                     |
| A0A2I0K6D9             |                       | Uncharacterized protein                                    | EF-hand domain-containing protein          |
| A0A2I0JKR6             |                       | Uncharacterized protein                                    | Calcium-dependent protein kinase 33        |
| A0A2I0JDV3             |                       | Uncharacterized protein                                    | UTP-glucose-1-phosphate uridyl transferase |
| A0A2I0ISS2             |                       | Uncharacterized protein                                    | Vesicle-associated membrane protein 711    |
| A0A2I0I8E7             |                       | Uncharacterized protein                                    | Calmodulin                                 |
| A0A2I8XHL8             | 4                     | Adenosyl homocysteinase                                    |                                            |
| A0A2I8XPJ6             |                       | Bet_v_1 domain-containing protein                          |                                            |
| A0A2I0KTL7             |                       | FAD-binding PCMH-type domain-containing                    |                                            |
| A0A2I8VV18             |                       | FAS1 domain-containing protein                             |                                            |
| A0A2I0IPN9             |                       | Glutamate decarboxylase                                    |                                            |
| A0A2I0L0D7             |                       | Glutathione peroxidase                                     |                                            |
| A0A2I0L2P0             |                       | Guanosine nucleotide diphosphate<br>dissociation inhibitor |                                            |
| A0A2I0HHP3             |                       | Peroxidase_4 domain-containing protein                     |                                            |
| A0A2I0KAI7             |                       | Phosphoglycerate kinase                                    |                                            |
| A0A2I8WW85             |                       | Serine hydroxymethyltransferase                            |                                            |
| A0A2I0JD79             |                       | t-SNARE coiled-coil homology<br>domain-containing protein  |                                            |

**Table S1. Cont.**

| <b>Accession_PUNGR</b> | <b>Peptides (95%)</b> | <b>Uniprot description</b>                               | <b>NCBI blast description</b>                                 |
|------------------------|-----------------------|----------------------------------------------------------|---------------------------------------------------------------|
| A0A218VVR2             | 4                     | Tetraspanin (Tobamovirus multiplication protein 2A-like) |                                                               |
| A0A218VWB8             |                       | Uncharacterized protein                                  | CSC1-like protein HYP1                                        |
| A0A218XS57             |                       | Uncharacterized protein                                  | Triose phosphate isomerase                                    |
| A0A2I0LEM9             |                       | Uncharacterized protein                                  | Ras-related protein RABB1b isoform X1                         |
| A0A2I0L7K4             |                       | Uncharacterized protein                                  | ADP-ribosylation factor (ARF)                                 |
| A0A2I0L1W9             |                       | Uncharacterized protein                                  | Ras-related protein Rab-8A                                    |
| A0A2I0KSK1             |                       | Uncharacterized protein                                  | Ras-related protein Rab-2A-like                               |
| A0A2I0KPL9             |                       | Uncharacterized protein                                  | Vacuolar protein sorting-associated protein 32-like protein 2 |
| A0A2I0KBE9             |                       | Uncharacterized protein                                  | E3 ubiquitin-protein ligase XBAT35 isoform X3 (putative)      |
| A0A2I0K404             |                       | Uncharacterized protein                                  | Patellin-3                                                    |
| A0A2I0IF97             |                       | Uncharacterized protein                                  | Vacuolar protein sorting 34                                   |
| A0A2I0IE28             |                       | Uncharacterized protein                                  | Alcohol dehydrogenase                                         |
| A0A2I0HMU9             |                       | Uncharacterized protein                                  | Sucrose synthase                                              |
| A0A2I0HI15             |                       | Uncharacterized protein                                  | Tr-type G domain-containing protein                           |
| A0A2I0INS2             | 3                     | ACB domain-containing protein                            |                                                               |
| A0A218WJZ8             |                       | Bet_v_1 domain-containing protein                        |                                                               |
| A0A2I0HR90             |                       | Cation_ATPase_N domain-containing protein                |                                                               |

**Table S1. Cont.**

| <b>Accession_PUNGR</b> | <b>Peptides (95%)</b> | <b>Uniprot description</b>                               | <b>NCBI blast description</b>                        |
|------------------------|-----------------------|----------------------------------------------------------|------------------------------------------------------|
| A0A2I0HK32             | 3                     | DUF1421 domain-containing protein                        |                                                      |
| A0A2I0HV67             |                       | FAS1 domain-containing protein                           |                                                      |
| A0A2I0I4K5             |                       | Lipoaln_cytosolic_FA-bd_dom<br>domain containing protein |                                                      |
| A0A2I8XKL0             |                       | Lipoxygenase                                             |                                                      |
| A0A2I8VXA5             |                       | Nucleoside diphosphate kinase                            |                                                      |
| A0A2I0LFC8             |                       | Peptidase_M17_N domain-containing protein                |                                                      |
| A0A2I0K239             |                       | Peroxidase_4 domain-containing protein                   |                                                      |
| A0A2I0KMG5             |                       | SHSP domain-containing protein                           |                                                      |
| A0A2I0JZL7             |                       | SHSP domain-containing protein                           |                                                      |
| A0A2I8WC47             |                       | Uncharacterized protein                                  | Glutathione S-transferase DHAR2                      |
| A0A2I0KS56             |                       | Uncharacterized protein                                  | ADP-ribosylation factor-like protein 8a              |
| A0A2I0KLR7             |                       | Uncharacterized protein                                  | Ubiquitin                                            |
| A0A2I0KDA0             |                       | Uncharacterized protein                                  | Small GTP-binding domain containing protein          |
| A0A2I0K9D4             |                       | Uncharacterized protein                                  | Transitional endoplasmic reticulum ATPase (putative) |
| A0A2I0K3T5             |                       | Uncharacterized protein                                  | Ras-related protein Rab7                             |
| A0A2I0IIZ6             |                       | Uncharacterized protein                                  | Eukaryotic initiation factor 4A-3                    |
| A0A2I0I6Y3             |                       | Uncharacterized protein                                  | Ras-related protein RABD2c                           |
| A0A2I8XNQ6             |                       | USP domain-containing protein                            |                                                      |
| A0A2I0IHE0             | 3                     | USP domain-containing protein                            |                                                      |

**Table S1. Cont.**

| <b>Accession_PUNGR</b> | <b>Peptides (95%)</b> | <b>Uniprot description</b>                    | <b>NCBI blast description</b> |
|------------------------|-----------------------|-----------------------------------------------|-------------------------------|
| A0A2I0LDB4             | 3                     | Vacuolar proton pump subunit B                |                               |
| A0A2I0JMZ1             |                       | VPS37 C-terminal domain-containing protein    |                               |
| A0A218VVSQ8            | 2                     | AAI domain-containing protein                 |                               |
| A0A2I0IE30             |                       | AAI domain-containing protein                 |                               |
| A0A2I0L2R4             |                       | ADH_N_2 domain-containing protein             |                               |
| A0A2I0JMQ6             |                       | Aldo_keto_reductase domain-containing protein |                               |
| A0A2I0KNG9             |                       | ALIX_LYPXL_bnd domain-containing protein      |                               |
| A0A218X5B3             |                       | C2 domain-containing protein                  |                               |
| A0A2I0IHM1             |                       | Cupin_5 domain-containing protein             |                               |
| A0A218VSK8             |                       | Cysteine synthase                             |                               |
| A0A218X0I8             |                       | DLH domain-containing protein                 |                               |
| A0A218WHD8             |                       | Epimerase domain-containing protein           |                               |
| A0A2I0ILB4             |                       | Epimerase domain-containing protein           |                               |
| A0A218XV30             |                       | Flavodoxin-like domain-containing protein     |                               |
| A0A2I0INR0             |                       | FYVE-type domain-containing protein           |                               |
| A0A218XID6             |                       | Glutamine synthetase                          |                               |
| A0A2I0KEN9             |                       | GTP-binding nuclear protein                   |                               |
| A0A2I0I7B6             |                       | Helicase C-terminal domain-containing protein |                               |
| A0A2I0IUM5             |                       | Knot1 domain-containing protein               |                               |

**Table S1. Cont.**

| <b>Accession_PUNGR</b> | <b>Peptides (95%)</b> | <b>Uniprot description</b>                                               | <b>NCBI blast description</b>                                                        |
|------------------------|-----------------------|--------------------------------------------------------------------------|--------------------------------------------------------------------------------------|
| A0A2I0I7B2             | 2                     | Phosphoinositide phospholipase C                                         |                                                                                      |
| A0A2I8Y1J8             |                       | Profilin                                                                 |                                                                                      |
| A0A2I0HMR3             |                       | Pyr_redox_2 domain-containing protein                                    |                                                                                      |
| A0A2I0KTM0             |                       | Pyrophosphate-fructose 6-phosphate<br>1-phosphotransferase subunit alpha |                                                                                      |
| A0A2I8VW44             |                       | Remorin_C domain-containing protein                                      |                                                                                      |
| A0A2I0KH93             |                       | Superoxide dismutase [Cu-Zn]                                             |                                                                                      |
| A0A2I8X926             |                       | Thioredoxin domain-containing protein                                    |                                                                                      |
| A0A2I8WZ58             |                       | Thioredoxin                                                              |                                                                                      |
| A0A2I0L2R1             |                       | Uncharacterized protein                                                  | PKS_ER domain-containing protein                                                     |
| A0A2I0KI27             |                       | Uncharacterized protein                                                  | Aquaporin PIP2-2                                                                     |
| A0A2I0K238             |                       | Uncharacterized protein                                                  | Aquaporin PIP2-7                                                                     |
| A0A2I0JPH7             |                       | Uncharacterized protein                                                  | EF1_GNE domain-containing protein                                                    |
| A0A2I0JL20             |                       | Uncharacterized protein                                                  | Ras-related protein RIC2                                                             |
| A0A2I0IZ88             |                       | Uncharacterized protein                                                  | Pyr_redox_2 domain-containing protein<br>(probable Monodehydroascorbate reductase 2) |
| A0A2I0IHB3             |                       | Uncharacterized protein                                                  | Chaperone protein dnaJ-like protein                                                  |
| A0A2I0IEC7             |                       | Uncharacterized protein                                                  | Tetraspanin-8                                                                        |
| A0A2I0HIH2             |                       | Uncharacterized protein                                                  | Epimerase domain-containing protein                                                  |
| A0A2I8W2F8             |                       | USP domain-containing protein                                            |                                                                                      |

**Table S1. Cont.**

| <b>Accession_PUNGR</b> | <b>Peptides (95%)</b> | <b>Uniprot description</b>                                | <b>NCBI blast description</b> |
|------------------------|-----------------------|-----------------------------------------------------------|-------------------------------|
| A0A2I0II07             | 2                     | Vacuolar protein sorting-associated<br>protein 28 homolog |                               |
| A0A2I0J081             |                       | V-SNARE domain-containing protein                         |                               |
| A0A2I0JAS2             |                       | X8 domain-containing protein                              |                               |
